# Supplementary material
Source: MDPI journal article supplement (https://www.mdpi.com/2504-477X/7/8/328)
Supplement: s1 [file s1]

## Supplementary Materials

# CoP/EEBP/N-FLGS Nanocomposite as an Efficient Electrocatalyst of Hydrogen Evolution Reaction in Alkaline Media

Valerii K. Kochergin <sup>1,\*</sup>, Alexander S. Kotkin <sup>1</sup>, Roman A. Manzhos <sup>1</sup>, Alexander G. Krivenko <sup>1</sup>, Igor I. Khodos <sup>2</sup>, and Eugene N. Kabachkov <sup>1,3,\*</sup>

<sup>1</sup> Federal Research Center of Problem of Chemical Physics and Medicinal Chemistry, Russian Academy of Sciences, Acad. Semenov Ave. 1, 142432 Chernogolovka, Russia; krivenko@icp.ac.ru (A.G.K.)

<sup>2</sup> Institute of Microelectronics Technology and High Purity Materials, Russian Academy of Sciences, 142432 Chernogolovka, Russia;

<sup>3</sup> Institute of Solid State Physics, Russian Academy of Sciences, 2 Academician Osipyan Str., 142432 Chernogolovka, Russia

\* Correspondence: kochergin@icp.ac.ru (V.K.K.); en.kabachkov@gmail.com (E.N.K.)

## 1. Results

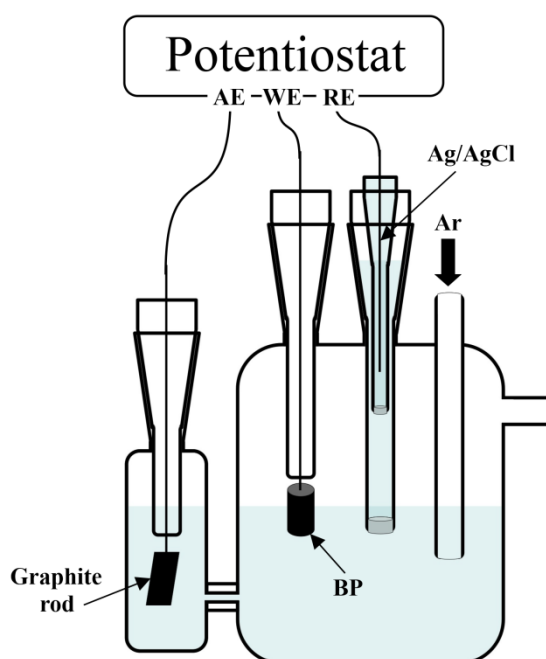

**Figure S1.** Schematic diagram of the cell for electrochemical expansion of black phosphorus.

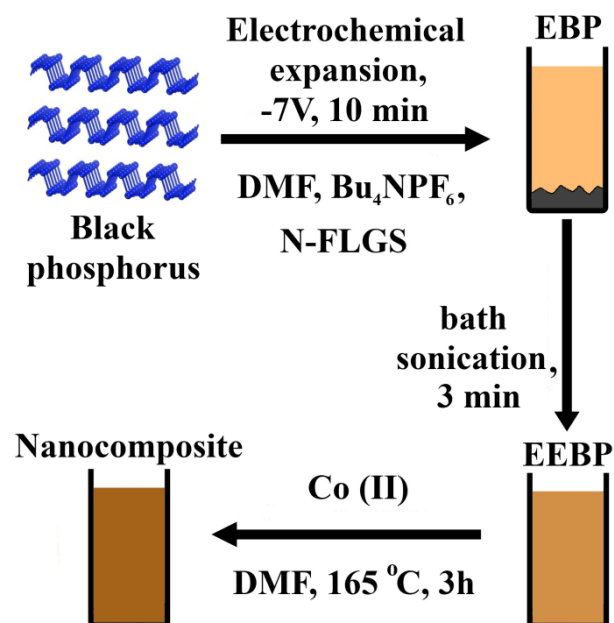

**Figure S2.** Schematic diagram of the synthesis of CoP/EEBP/N-FLGS nanocomposite.

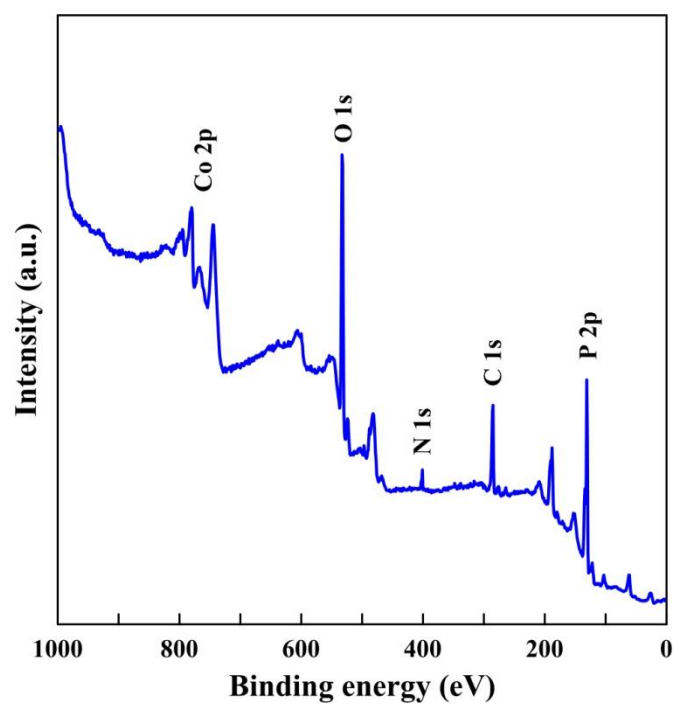

**Figure S3.** Survey XPS spectrum of CoP/EEBP/N-FLGS nanocomposite.

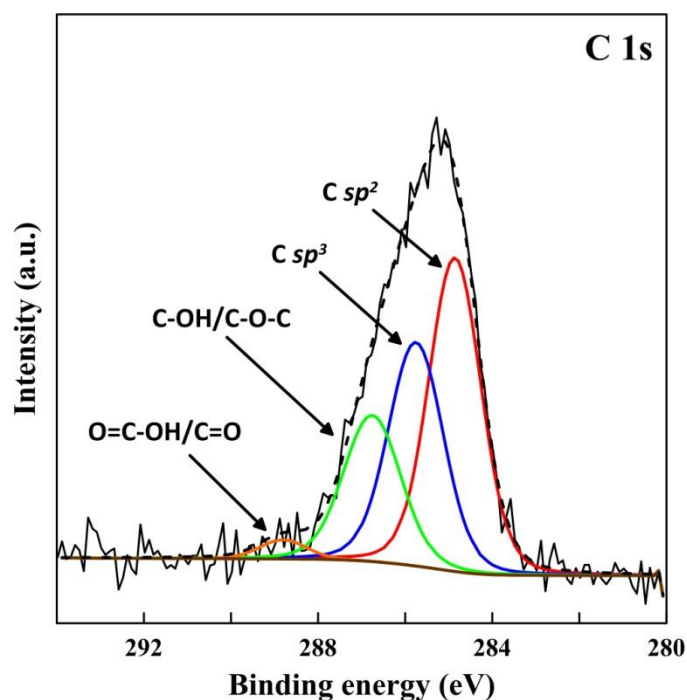

**Figure S4.** High resolution C 1s XPS spectrum of CoP/EEBP/N-FLGS nanocomposite.

**Table S1.** Elemental composition of the CoP/EEBP/N-FLGS surface (according to XPS results).

| Sample          | C, at. % | O, at. % | N, at. % | P, at. % | Co, at. % |
|-----------------|----------|----------|----------|----------|-----------|
| CoP/EEBP/N-FLGS | 23.3     | 29.5     | 1.2      | 41.9     | 4.1       |

**Table S2.** Comparison of electrocatalytic activity of catalysts based on cobalt phosphides towards HER.

| No | Catalyst              | $\eta_{10}^*$ , mV | Tafel slope, mV dec <sup>-1</sup> | Ref.      |
|----|-----------------------|--------------------|-----------------------------------|-----------|
| 1  | Co <sub>2</sub> P/BP  | 260                | 72                                | [36]      |
| 2  | CoP                   | 209                | 129                               | [47]      |
| 3  | CoP/Co <sub>2</sub> P | 198                | 82                                | [48]      |
| 4  | CoP                   | 275                | 101                               | [48]      |
| 5  | CoP                   | 265                | 123                               | [49]      |
| 6  | CoP                   | 280                | 94                                | [50]      |
| 7  | Co <sub>2</sub> P     | 215                | 78                                | [51]      |
| 8  | Co <sub>2</sub> P     | 345                | 128                               | [52]      |
| 9  | CoP/Co <sub>2</sub> P | 226                | 114                               | [53]      |
| 10 | CoP                   | 203                | 65                                | [54]      |
| 11 | CoP                   | 215                | 52                                | [55]      |
| 12 | CoP/EEBP/N-FLGS       | 190                | 78                                | This work |

\*  $\eta_{10}$  is overpotential at current density of 10 mA cm<sup>-2</sup>.

## References

36. Wang, J.; Liu, D.; Huang, H.; Yang, N.; Yu, B.; Wen, M.; Wang, X.; Chu, P.K.; Yu, X.-F. In-Plane Black Phosphorus/Dicobalt Phosphide Heterostructure for Efficient Electrocatalysis. *Angew. Chem.* **2018**, *130*, 2630–2634, doi:10.1002/ange.201710859.
47. Tian, J.; Liu, Q.; Asiri, A.M.; Sun, X. Self-Supported Nanoporous Cobalt Phosphide Nanowire Arrays: An Efficient 3D Hydrogen-Evolving Cathode over the Wide Range of pH 0–14. *J. Am. Chem. Soc.* **2014**, *136*, 7587–7590, doi:10.1021/ja503372r.
48. Lv, X.; Ren, J.-T.; Wang, Y.; Liu, Y.-P.; Yuan, Z.-Y. Well-Defined Phase-Controlled Cobalt Phosphide Nanoparticles Encapsulated in Nitrogen-Doped Graphitized Carbon Shell with Enhanced Electrocatalytic Activity for Hydrogen Evolution Reaction in all-pH. *ACS Sustain. Chem. Eng.* **2019**, *7*, 8993–9001, doi:10.1021/acssuschemeng.9b01263

49. Song, J.; Zhu, C.; Xu, B.Z.; Fu, S.; Engelhard, M.H.; Ye, R.; Du, D.; Beckman, S.P.; Lin, Y. Bimetallic Cobalt-Based Phosphide Zeolitic Imidazolate Framework: CoP<sub>x</sub> Phase-Dependent Electrical Conductivity and Hydrogen Atom Adsorption Energy for Efficient Overall Water Splitting. *Adv. Energy Mater.* **2017**, *7*, 1601555, doi:10.1002/aenm.201601555.
50. Feng, Y.; Yu, X.-Y.; Paik, U. Nickel Cobalt Phosphides Quasi-Hollow Nanocubes as an Efficient Electrocatalyst for Hydrogen Evolution in Alkaline Solution. *Chem. Commun.* **2016**, *52*, 1633–1636, doi:10.1039/C5CC08991C.
51. Yang, M.; Feng, F.; Wang, K.; Li, S.; Huang, X.; Gong, L.; Ma, L.; Li, R. Synthesis of Metal Phosphide Nanoparticles Supported on Porous N-Doped Carbon Derived from Spirulina for Universal-pH Hydrogen Evolution. *ChemSusChem* **2020**, *13*, 351–359, doi:10.1002/cssc.201902920.
52. Zhang, X.-Y.; Guo, B.-Y.; Chen, Q.-W.; Dong, B.; Zhang, J.-Q.; Qin, J.-F.; Xie, J.-Y.; Yang, M.; Wang, L.; Chai, Y.-M.; et al. Ultrafine and Highly-Dispersed Bimetal Ni<sub>2</sub>P/Co<sub>2</sub>P Encapsulated by Hollow N-Doped Carbon Nanospheres for Efficient Hydrogen Evolution. *Int. J. Hydrogen Energy* **2019**, *44*, 14908–14917, doi:10.1016/j.ijhydene.2019.04.108.
53. Chen, A.; Fu, L.; Xiang, W.; Wei, W.; Liu, D.; Liu, C. Facile Synthesis of Ni<sub>5</sub>P<sub>4</sub> Nanosheets/Nanoparticles for Highly Active and Durable Hydrogen Evolution. *Int. J. Hydrogen Energy* **2021**, *46*, 11701–11710, doi:10.1016/j.ijhydene.2021.01.079.
54. Yang, S.; Chen, L.; Wei, W.; Lv, X.; Xie, J. CoP Nanoparticles Encapsulated in Three-Dimensional N-Doped Porous Carbon for Efficient Hydrogen Evolution Reaction in a Broad PH Range. *Appl. Surf. Sci.* **2019**, *476*, 749–756, doi:10.1016/j.apsusc.2019.01.131.
55. Tabassum, H.; Guo, W.; Meng, W.; Mahmood, A.; Zhao, R.; Wang, Q.; Zou, R. Metal-Organic Frameworks Derived Cobalt Phosphide Architecture Encapsulated into B/N Co-Doped Graphene Nanotubes for All pH Value Electrochemical Hydrogen Evolution. *Adv. Energy Mater.* **2017**, *7*, 1601671, doi:10.1002/aenm.201601671.
